# Supplementary material for: Facultative mobilization of eggshell calcium promotes embryonic growth in an oviparous snake
Source: Oxford University Press journal article supplement (doi:10.1242/jeb.193565), 2019-01-01
Supplement: jeb193565supp.pdf [file jeb193565supp.pdf]

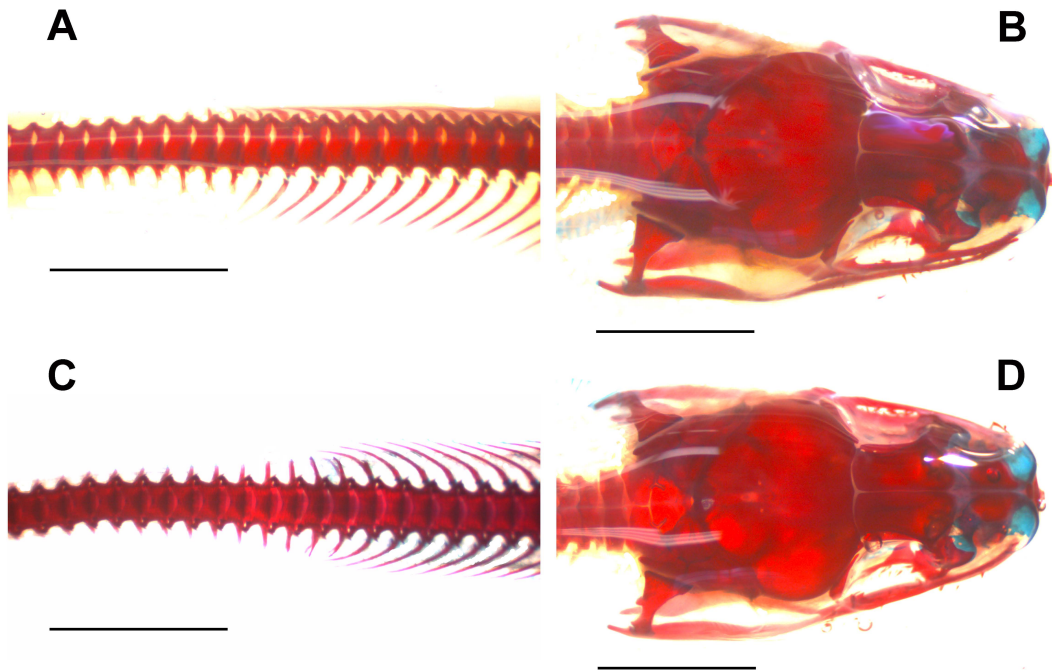

**Figure S1. Cleared and stained (alizarin red S, alcian blue) specimens of hatchling *Pantherophis guttatus*.** A. Thoracic vertebrae, hatchling from intact egg. B. Skull and cervical vertebrae, hatchling from intact egg. C. Thoracic vertebrae, hatchling from peeled egg. D. Skull and cervical vertebrae, hatchling from peeled egg. Scale bars = 5 mm.

Table S1. ANOVA table for analysis of embryonic calcium content depicted in Figure 3A.

| Effect           | Numerator DF | Denominator DF | F value | P        |
|------------------|--------------|----------------|---------|----------|
| Treatment        | 1            | 82.1           | 16.6    | 0.0001   |
| Days to hatch    | 3            | 81.5           | 163.2   | < 0.0001 |
| Treatment * Days | 3            | 79.4           | 6.7     | 0.0004   |
| Year             | 1            | 8.2            | 3.6     | 0.09     |
| Initial egg mass | 1            | 19             | 36.5    | < 0.0001 |

Table S2. ANOVA table for analysis of embryonic calcium concentration (calcium adjusted for embryo dry mass) depicted in Figure 3B.

| Effect           | Numerator DF | Denominator DF | F value | P        |
|------------------|--------------|----------------|---------|----------|
| Treatment        | 1            | 78.2           | 12.4    | 0.0007   |
| Days to hatch    | 3            | 80.5           | 0.1     | 0.94     |
| Treatment * Days | 3            | 78.2           | 9.3     | < 0.0001 |
| Year             | 1            | 8.4            | 0.1     | 0.74     |
| Embryo dry mass  | 1            | 85.4           | 256.1   | < 0.0001 |

Table S3. ANOVA table for analysis of yolk calcium content depicted in Table 2.

| Effect           | Numerator DF | Denominator DF | F value | P        |
|------------------|--------------|----------------|---------|----------|
| Treatment        | 1            | 80.6           | 2.6     | 0.11     |
| Days to hatch    | 3            | 79.1           | 244.8   | < 0.0001 |
| Treatment * Days | 3            | 78.1           | 0.6     | 0.62     |
| Year             | 1            | 8.5            | 3.1     | 0.11     |
| Initial egg mass | 1            | 44.7           | 15.7    | 0.0003   |

Table S4. ANOVA table for analysis of yolk calcium concentration (calcium adjusted for yolk dry mass).

| Effect           | Numerator DF | Denominator DF | F value | P        |
|------------------|--------------|----------------|---------|----------|
| Treatment        | 1            | 77             | 0.7     | 0.40     |
| Days to hatch    | 3            | 78.9           | 1.8     | 0.16     |
| Treatment * Days | 3            | 77.1           | 0.4     | 0.73     |
| Year             | 1            | 8.3            | 0.2     | 0.63     |
| Yolk dry mass    | 1            | 82.5           | 312.1   | < 0.0001 |

Table S5. ANOVA table for analysis of egg wet mass at sampling.

| Effect           | Numerator DF | Denominator DF | F value | P        |
|------------------|--------------|----------------|---------|----------|
| Treatment        | 1            | 39.5           | 19.6    | < 0.0001 |
| Days to hatch    | 2            | 37.1           | 18.9    | < 0.0001 |
| Treatment * Days | 2            | 36.3           | 0.3     | 0.71     |
| Year             | 1            | 7.8            | 6.7     | 0.03     |
| Initial egg mass | 1            | 21.3           | 4.0     | 0.06     |

Table S6. ANOVA table for analysis of hatchling total length depicted in Table 3.

| Effect           | Numerator DF | Denominator DF | F value | P        |
|------------------|--------------|----------------|---------|----------|
| Treatment        | 1            | 41.9           | 18.7    | < 0.0001 |
| Year             | 1            | 9.1            | 3.3     | 0.10     |
| Initial egg mass | 1            | 13.4           | 34.8    | < 0.0001 |

Table S7. ANOVA table for analysis of embryonic wet mass depicted in Figure 4A.

| Effect           | Numerator DF | Denominator DF | F value | P        |
|------------------|--------------|----------------|---------|----------|
| Treatment        | 1            | 81.8           | 10.5    | 0.0018   |
| Days to hatch    | 3            | 80.5           | 79.8    | < 0.0001 |
| Treatment * Days | 3            | 79.4           | 2.3     | 0.08     |
| Year             | 1            | 8.9            | 4.5     | 0.06     |
| Initial egg mass | 1            | 43.5           | 34.0    | < 0.0001 |

Table S8. ANOVA table for analysis of embryonic dry mass depicted in Figure 4B.

| Effect           | Numerator DF | Denominator DF | F value | P        |
|------------------|--------------|----------------|---------|----------|
| Treatment        | 1            | 81.6           | 7.1     | 0.009    |
| Days to hatch    | 3            | 80.3           | 236.9   | < 0.0001 |
| Treatment * Days | 3            | 79.4           | 1.4     | 0.25     |
| Year             | 1            | 8.9            | 1.3     | 0.28     |
| Initial egg mass | 1            | 50.2           | 32.7    | < 0.0001 |

Table S9. ANOVA table for analysis of yolk wet mass depicted in Figure 4C.

| Effect           | Numerator DF | Denominator DF | F value | P        |
|------------------|--------------|----------------|---------|----------|
| Treatment        | 1            | 80.7           | 1.8     | 0.18     |
| Days to hatch    | 3            | 79.1           | 401.4   | < 0.0001 |
| Treatment * Days | 3            | 78.0           | 1.1     | 0.37     |
| Year             | 1            | 8.3            | 2.7     | 0.14     |
| Initial egg mass | 1            | 39.1           | 19.3    | < 0.0001 |

Table S10. ANOVA table for analysis of yolk dry mass depicted in Figure 4D.

| Effect           | Numerator DF | Denominator DF | F value | P        |
|------------------|--------------|----------------|---------|----------|
| Treatment        | 1            | 81.5           | 0.04    | 0.85     |
| Days to hatch    | 3            | 81.2           | 352.1   | < 0.0001 |
| Treatment * Days | 3            | 79.0           | 0.4     | 0.74     |
| Year             | 1            | 8.7            | 1.8     | 0.21     |
| Initial egg mass | 1            | 17.5           | 31.2    | < 0.0001 |

Table S11. ANOVA table for analysis of hatchling snout vent length depicted in Table 4.

| Effect           | Numerator DF | Denominator DF | F value | P        |
|------------------|--------------|----------------|---------|----------|
| Treatment        | 1            | 15.2           | 9.6     | 0.007    |
| Maternal ID      | 14           | 13.9           | 4.2     | 0.006    |
| Initial egg mass | 1            | 15             | 19.9    | < 0.0001 |

Table S12. ANOVA table for analysis of hatchling mass depicted in Table 4.

| Effect           | Numerator DF | Denominator DF | F value | P        |
|------------------|--------------|----------------|---------|----------|
| Treatment        | 1            | 15.2           | 8.6     | 0.01     |
| Maternal ID      | 14           | 14.2           | 2.2     | 0.01     |
| Initial egg mass | 1            | 15             | 25.6    | < 0.0001 |

Table S13. ANOVA table for analysis of hatchling skull length depicted in Table 4.

| Effect      | Numerator DF | Denominator DF | F value | P     |
|-------------|--------------|----------------|---------|-------|
| Treatment   | 1            | 17.2           | 5.9     | 0.03  |
| Maternal ID | 14           | 13.6           | 6.3     | 0.001 |

Table S14. ANOVA table for analysis of hatchling vertebral length depicted in Table 4.

|                 | Effect    | DF       | Sum of Squares | Mean Square | F value | P    |
|-----------------|-----------|----------|----------------|-------------|---------|------|
| Cervical        | Treatment | 1, 15.8  | 0.05           | 0.05        | 1.17    | 0.30 |
|                 | Female    | 14, 13.4 | 1.18           | 0.08        | 1.83    | 0.14 |
| Thoracic 1-5    | Treatment | 1, 17.7  | 0.33           | 0.33        | 5.3     | 0.03 |
|                 | Female    | 14, 13.7 | 2.43           | 0.17        | 2.8     | 0.03 |
| Last 5 Thoracic | Treatment | 1, 17.6  | 0.44           | 0.44        | 6.9     | 0.02 |
|                 | Female    | 14, 13.7 | 1.98           | 0.14        | 2.3     | 0.07 |
| Caudal 1-5      | Treatment | 1, 14.6  | 0.36           | 0.36        | 5.4     | 0.04 |
|                 | Female    | 14, 13.2 | 1.82           | 0.13        | 1.8     | 0.14 |
| Last 5 Caudal   | Treatment | 1, 15.2  | 0.06           | 0.06        | 0.2     | 0.66 |
|                 | Female    | 14, 10.3 | 5.36           | 0.38        | 1.3     | 0.34 |
